# Supplementary material
Source: PubMed Central journal article supplement (PMC7155920)
Supplement: NIHMS1566229-supplement-316404_Major_Resources_Table.pdf [file NIHMS1566229-supplement-316404_Major_Resources_Table.pdf]

## Major Resources Table

### Data & Code Availability

| Description                                    | Source / Repository | Persistent ID / URL                                                                                                                   |
|------------------------------------------------|---------------------|---------------------------------------------------------------------------------------------------------------------------------------|
| Functional scale (cell and tissue) model codes | GitHub              | <a href="https://github.com/ClancyLabUCD/From-the-atom-to-the-rhythm">https://github.com/ClancyLabUCD/From-the-atom-to-the-rhythm</a> |
